# Supplementary material for: CRIF1 deficiency suppresses endothelial cell migration via upregulation of RhoGDI2
Source: PubMed Central journal article supplement (PMC8389428; doi:10.1371/journal.pone.0256646), 2021-08-26
Supplement: pone.0256646.s001.pdf [file pone.0256646.s001.pdf]

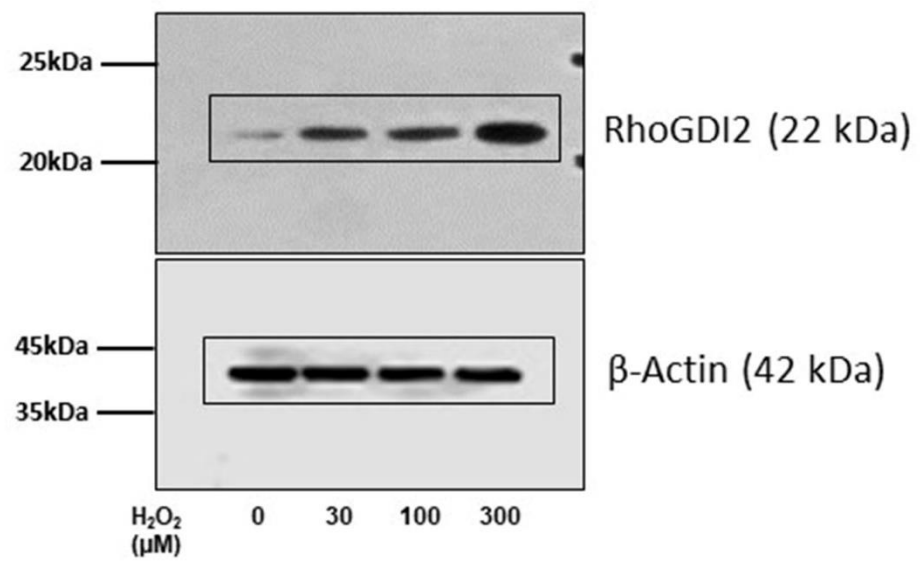

Fig 1E

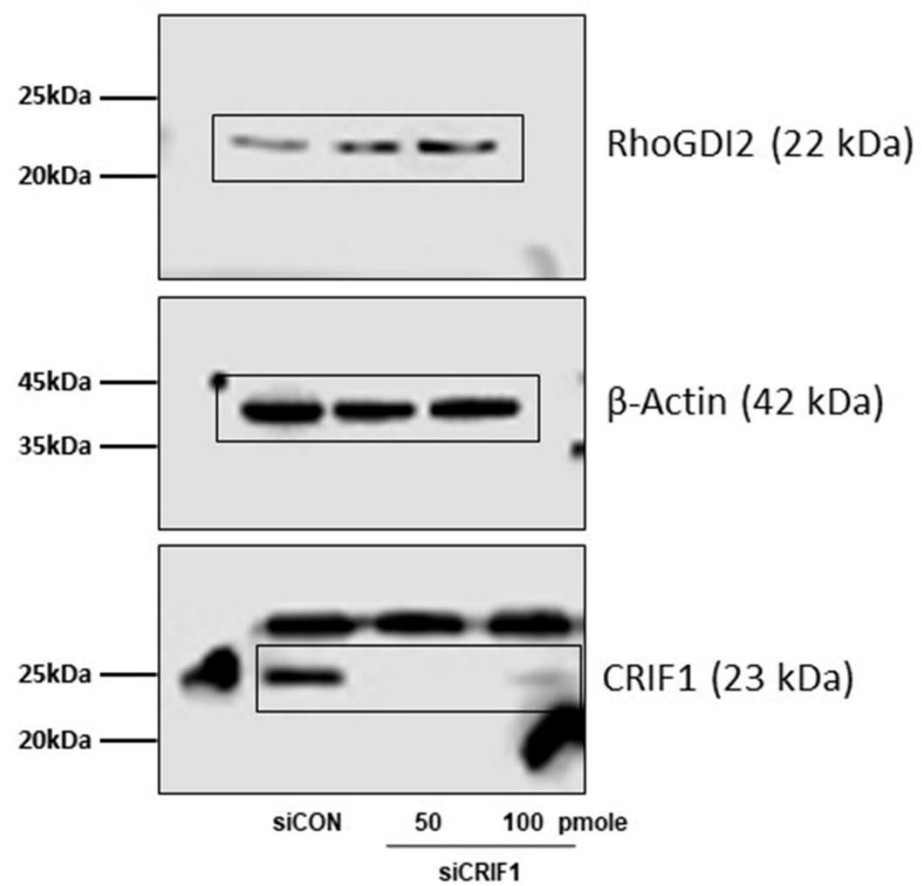

Fig 1F

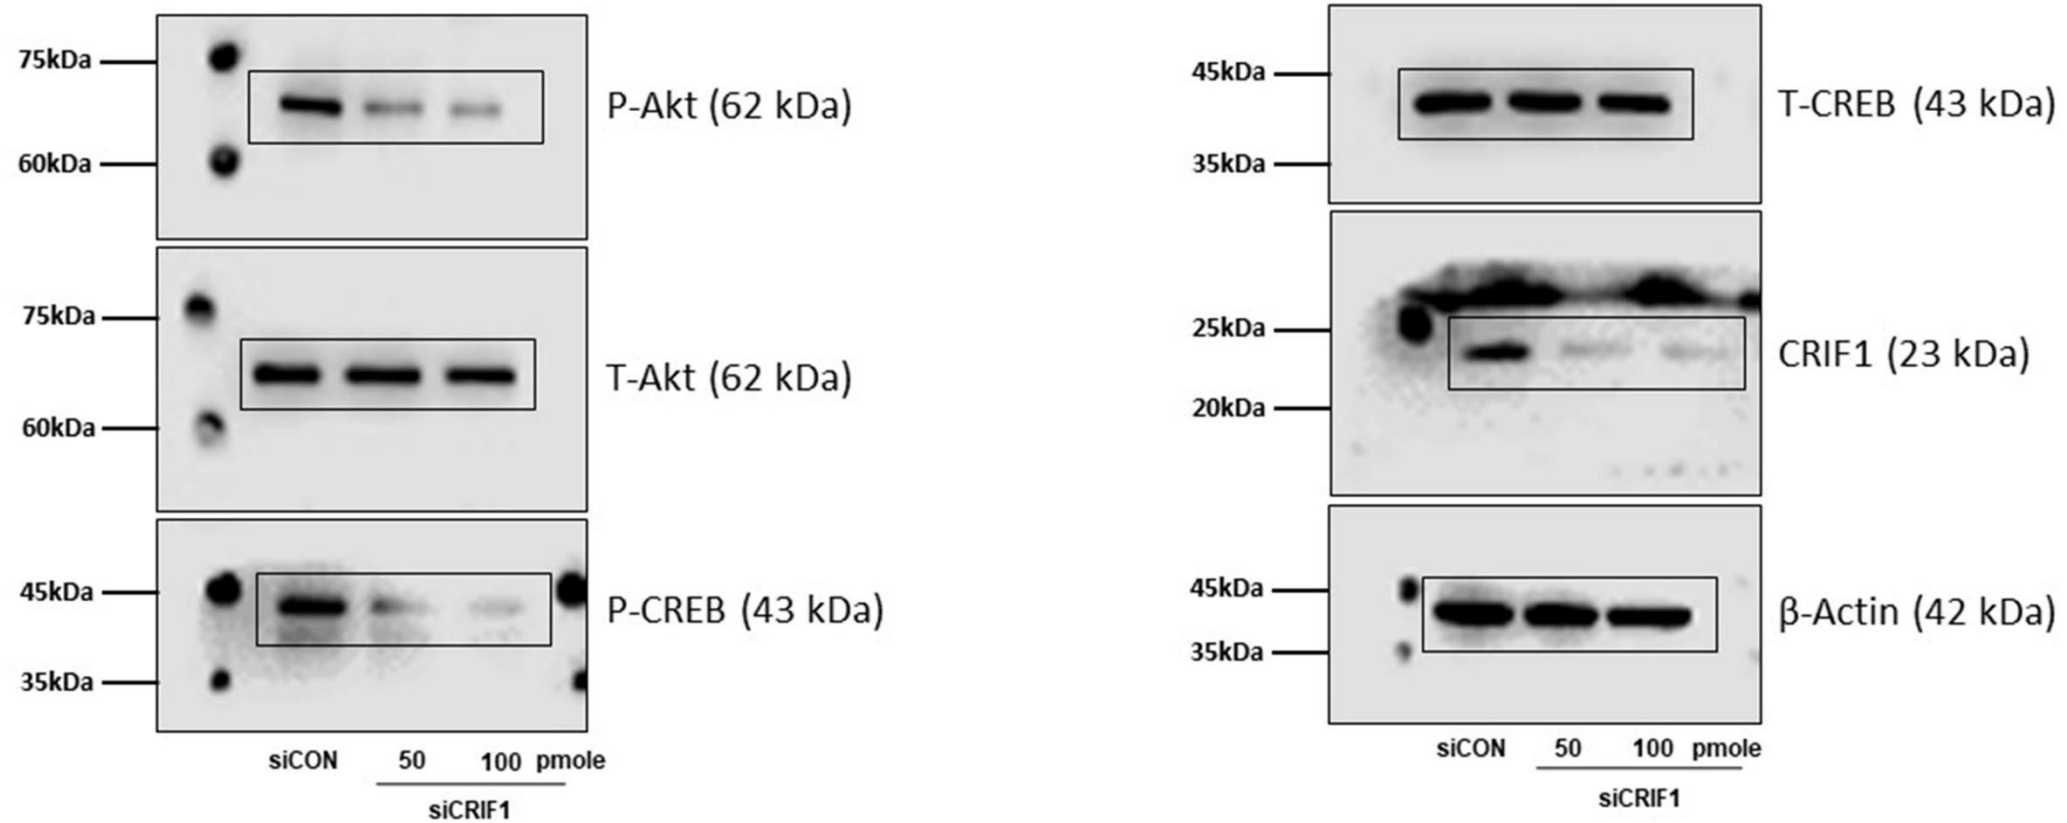

Fig 1G

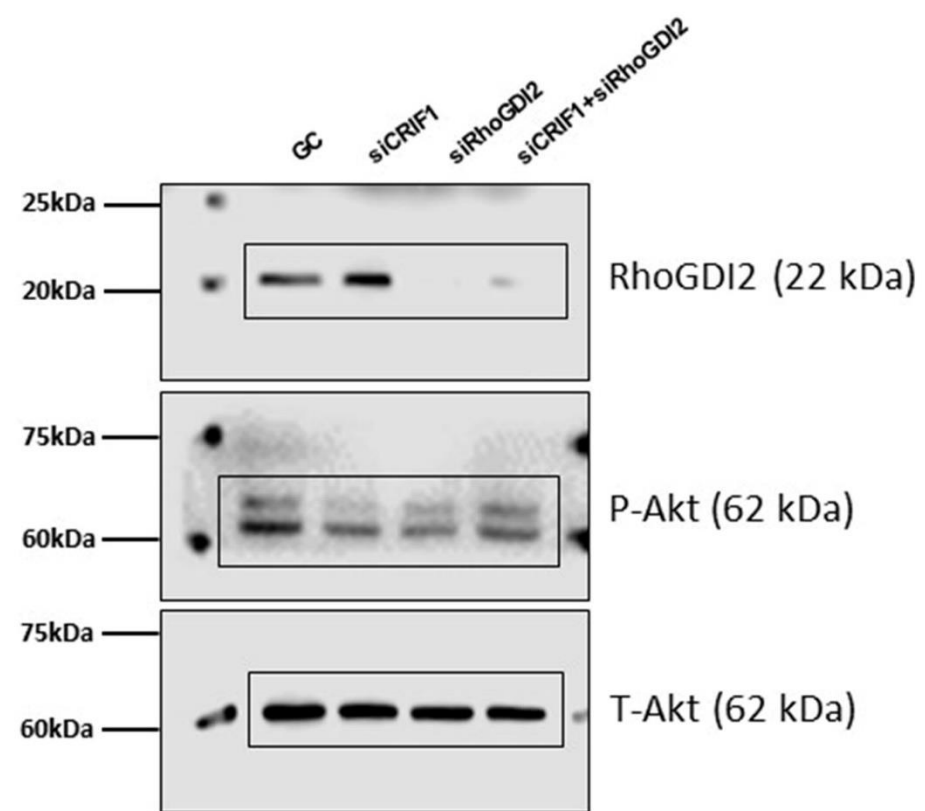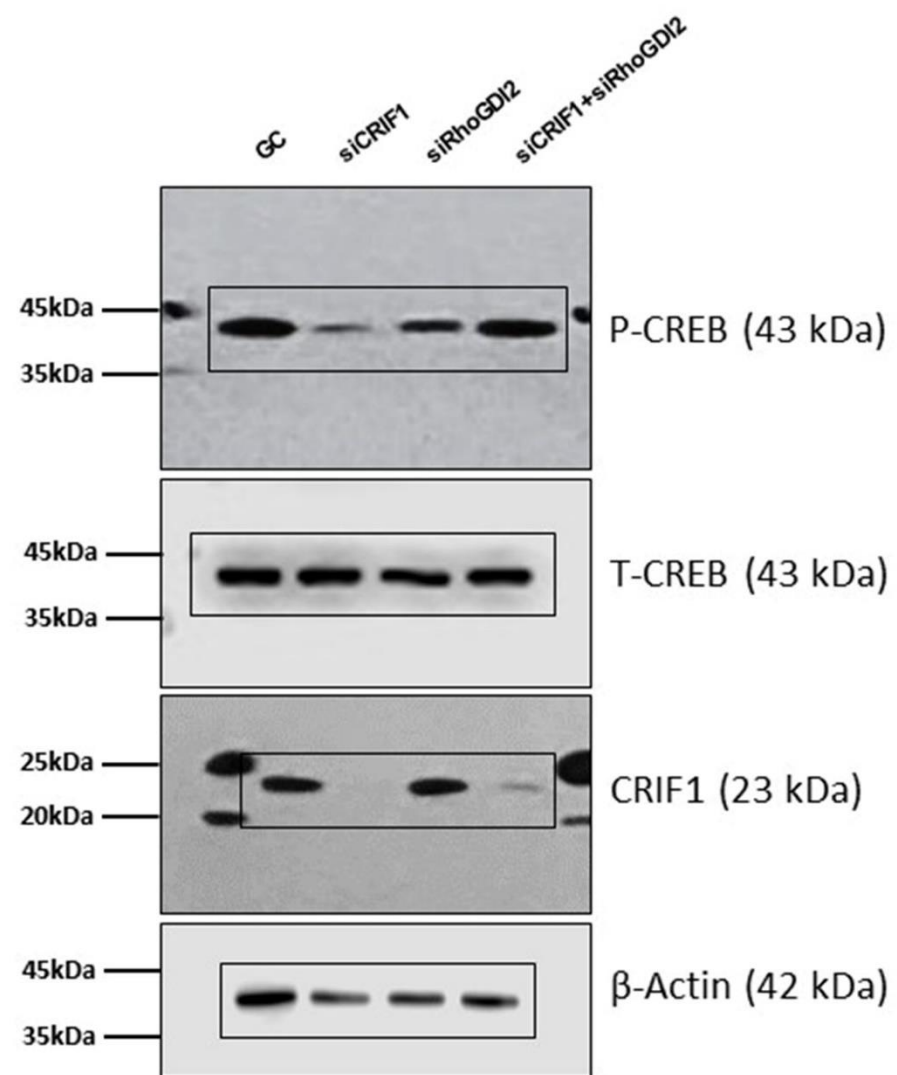

Fig 2A

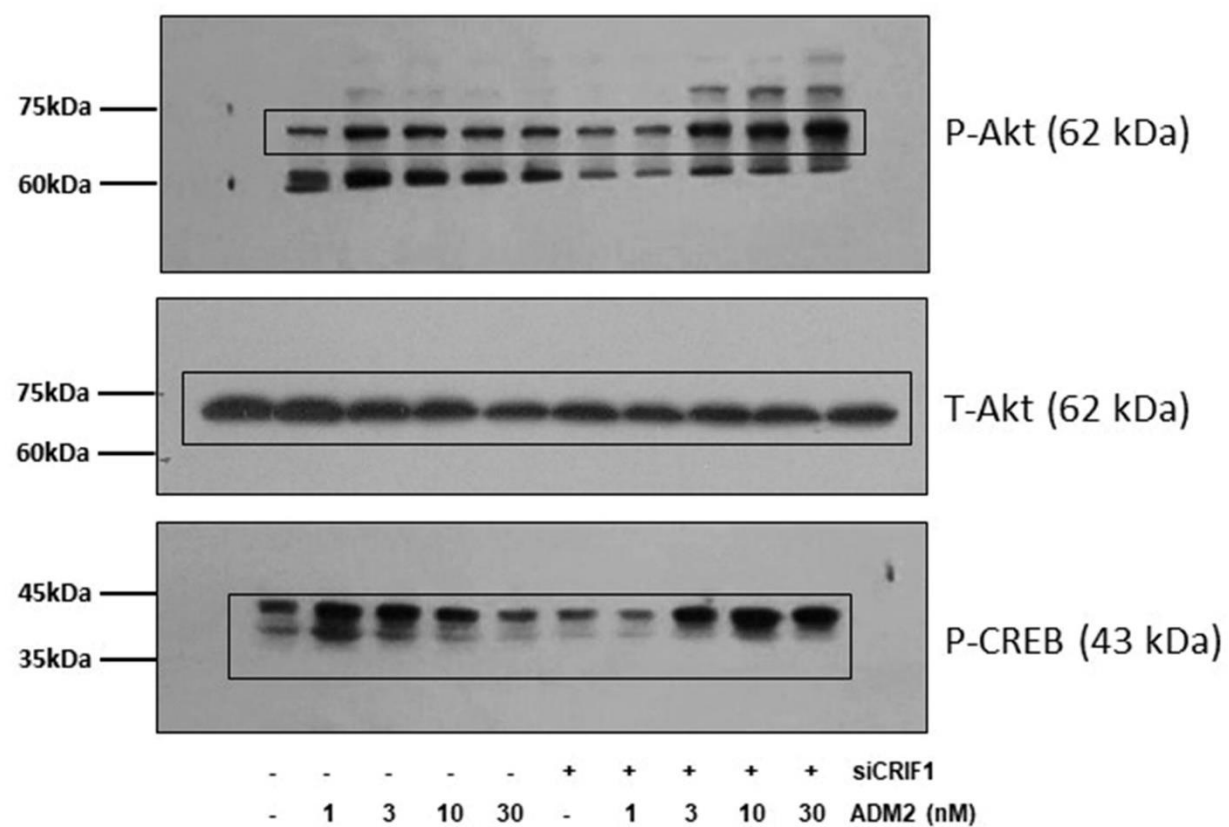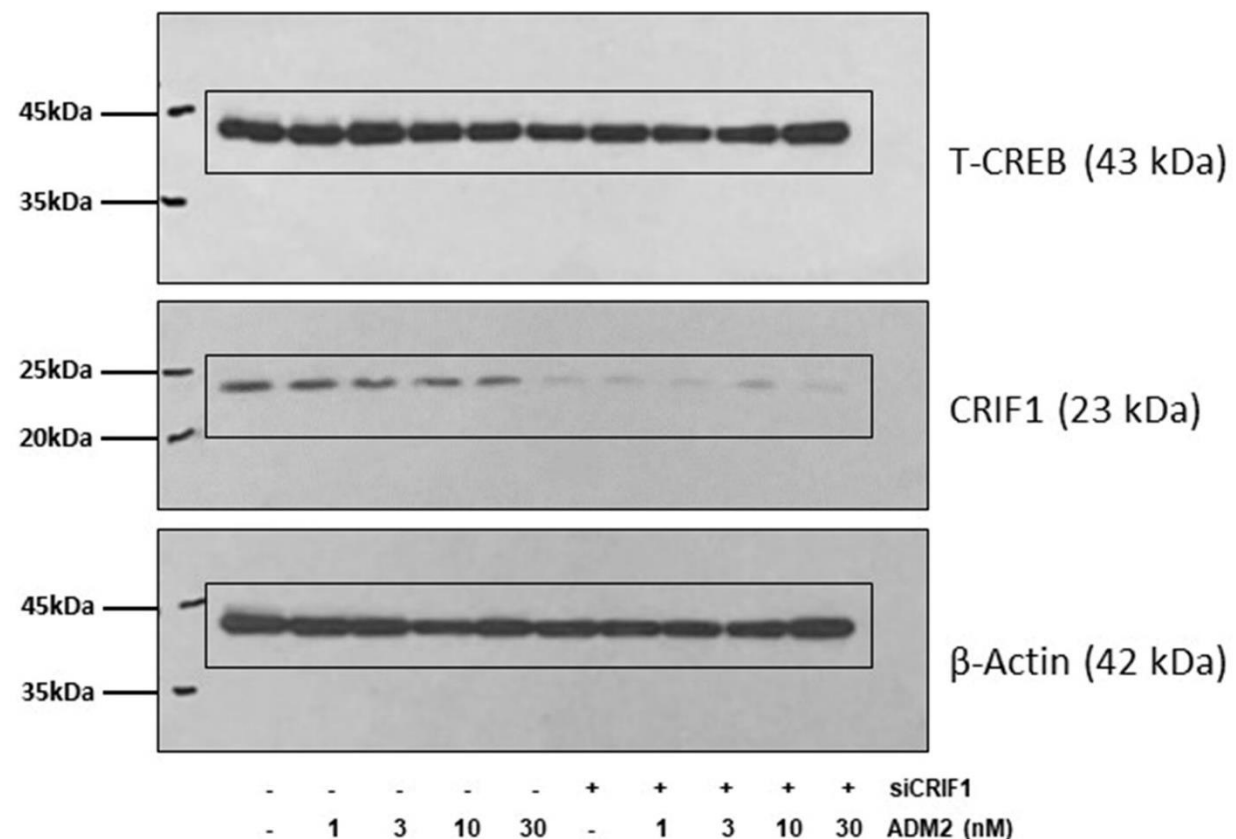

Fig 4D
